# Supplementary material
Source: PubMed Central journal article supplement (PMC283525)
Supplement: pnas_100_24_13940__3.pdf [file pnas_100_24_13940__3.pdf]

Chop1. MSRRPWL L L A L A L A V A L A A G S A G A S T G S D A T V P V A T Q D G P D Y V F H R A H E R M L F Q T S Y T L E N 60  
Chop2. . . . . M D Y G G A L S A V G R E L L F V T N P V V V 23  
Bop. . . . . M L E L L

\* \* \*

Chop1. N G S V I C I P N N G Q C F C L A W L K S N - G T N A E K L A A N I L O W I T F A L S A L C L M F Y G Y O T W K S T C G 119  
Chop2. N G S V L - V P - E D Q C Y C A G W I E S R - G T N G A Q T A S N V L O W L A A G F S I L L L M F Y A Y O T W K S T C G 80  
Bop. P T A V E G V S Q A Q I T G R P F E W I W L A L G T A L M G L G T L Y F L V K G M G V S D P D A K K F Y A I T T L V P A I 52

\* \* \* \* \* \* \* \* \*

Chop1. W E E I Y V A T I E M I K F I I E Y F H E F D E P A V I Y S S N G N K T V W L Y A E W L L T C P V I L I T L S N L T G 179  
Chop2. W E E I Y V C A I E M V K V I L E F F F E F K N P S M L Y L A T G H R V Q W L Y A E W L L T C P V I L I T L S N L T G 140  
Bop. A F T M V L S M L L G Y G L T M V P F G G E Q - - - - - N P I Y W A Y A D W L F T P L L L L D L A - I L L V 101

\* \* \* \* \* \* \* \*

Chop1. L A N D Y N K R T M - G L L V S D I G T I V W G T T A A L S K G Y - V R V I F F L M G L C Y G I Y T F F N A A - K V Y I 236  
Chop2. L S N D Y S R R T M - G L L V S D I G T I V W G A T S A M A T G Y - V K V I F F C L G L C Y G A N T F F H A A - K A Y I 197  
Bop. - D A D - Q - G T I L A L V G A D G I M I G T G L V G A L T K V Y S Y R F V W W A I S T A A M L Y I L Y V L F F G F T S 158

\* \* \* \* \* \* \* \* #

Chop1. E A Y H T V P K G I C R D L V R Y L A W L Y F C S W A M F P V L F L L G P E G F G H I N Q F N S A I A H A I L L A S K 296  
Chop2. E G Y H T V P K G R C R Q V V T G M A W L F F V S W G M F P I L F I L G P E G F G V L S V Y G S T V G H T I I L M S K 257  
Bop. K A E S M R P E V - - A S T F K V L R N V T V V L W S A Y P V V W L I G S E G A G I V P L N I E T L L F M V L D V S A K 216

Chop1. N A W S M M G H F L R V K I H E H I L L Y G D I R K K Q K V N V A G Q E M E V E T M V H E E D D E T Q K V P - T A K Y A 356  
Chop2. N C W G L L G H Y L R V L I H E H I L I H G D I R K T T K L N I G G T E I E V E T L V E D E A E A G A V N K G T G K Y A 317  
Bop. V G F G L I - - L L R S R A I F G E A E A P E P S A G D G A - A A T S D . . . . .

Chop1. N R D S F I I M R D R L K E K G F E T R A S L D G D P N G D A E A N A A A G G K P G M E M G K M T G M G M S M G A G M G 415  
Chop2. S R E S F L V M R D K M K E K G I D V R A S L D N S K E V E Q E Q A A R A A M M M M N G N G M G M G M G M N G M N G M G 377

Chop1. M A T I D S - - - - - G R V I L A V P D I S M V D F F R E Q F A R L P V P Y E L V P A L G A E N T L 460  
Chop2. G M N G M A G G A K P G L E L T P Q L Q P G R V I L A V P D I S M V D F F R E Q F A Q L S V T Y E L V P A L G A D N T L 437

Chop1. Q L V Q Q A Q S L G G C D F V L M H P E F L R D R S P T G L L P R L K M G G Q R A A A F G W A A I G P M R D L I E G S G 520  
Chop2. A L V T Q A Q N L G G V D F V L I H P E F L R D R S S T S I L S R L R G A G Q R V A A F G W A Q L G P M R D L I E S A N 497

Chop1. V D G W L E G P S F G A G I N Q Q A L V A L I N R M Q Q A K K M G M M G - - - - - G M G M G M G G M G - M G 570  
Chop2. L D G W L E G P S F G Q G I L P A H I V A L V A K M Q Q M R K M Q Q M Q Q I G M M T G G M N G M G G M G M G G M N G M G 557

Chop1. M G M G M G - M A P S M N A G M T G M G G - - - A S M G G - - - - - A V M G M G M G M Q P M Q Q A M P - - A M S P M M 618  
Chop2. G G N G M N N M G N G M G G G M G N G M G G N G M N G M G G G N G M N N M G G N G M A G N G M G G G M G G N G M G G S M 617

Chop1. T Q Q P S - M M S Q P S A M S A G G A M Q A M G V M P S P A P - - - - - G G R V G T N P L F G S A P S P L S S Q - - - - 669  
Chop2. N G M S S G V V A N V T P S A A G G M G M M N G G M A A P Q S P G M N G G R L G T N P L F N A A P S P L S S Q L G A E 677

Chop1. - - - - - P G I S P G M A T P P A A T A A P A A G G S E A E M L Q Q L M S E I N R L K N E L G E 712  
Chop2. A G M G S M G G M G G M S G M G G M G M G G A G A A T T Q A A G G N A E A E M L Q N L M N E I N R L K R E L G E 737

Fig.5 a
