# Supplementary material
Source: PubMed Central journal article supplement (PMC283525)

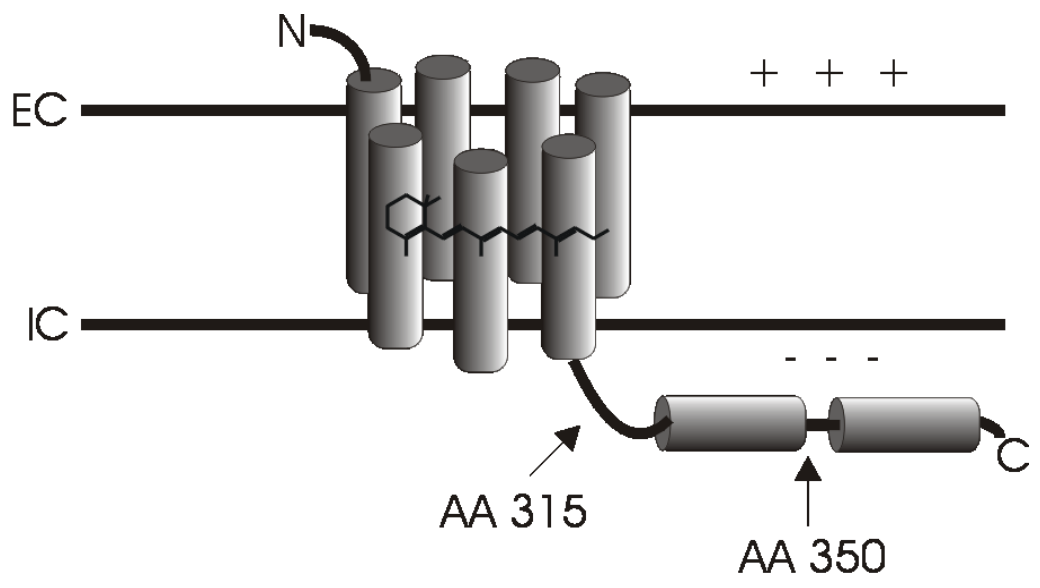

Supplement: pnas_100_24_13940__4.pdf [file pnas_100_24_13940__4.pdf]
